# Supplementary material for: An untargeted lipidomic approach for qualitative determination of latent fingermark glycerides using UPLC-IMS-QToF-MSE
Source: Royal Society of Chemistry journal article supplement (doi:10.1039/c9an00521h), 2019-01-01
Supplement: c9an00521h1.pdf [file c9an00521h1.pdf]

## An untargeted lipidomic approach for qualitative determination of latent fingerprint glycerides using UPLC-IMS-QToF-MSE

A.A. Frick\*, C. Weyermann

École des Sciences Criminelles, Université de Lausanne, Batochime, 1015 Lausanne, Switzerland

### Supporting information

| Glyceride standard | Glyceride structure | Average retention time (min) | Average experimental $m/z$ ( $[M+H-H_2O]^+$ ) | Average CCS ( $\text{\AA}^2$ ) ( $[M+H-H_2O]^+$ ) | Average experimental $m/z$ ( $[M+Na]^+$ ) | Average CCS ( $\text{\AA}^2$ ) ( $[M+Na]^+$ ) |
|--------------------|---------------------|------------------------------|-----------------------------------------------|---------------------------------------------------|-------------------------------------------|-----------------------------------------------|
| Dimyristin         | DG<br>14:0_14:0     | 7.18                         | 495.4409                                      | 253.2                                             | 535.4332                                  | 248.3                                         |
| Dipalmitolein      | DG<br>16:1_16:1     | 7.71                         | 547.4724                                      | 260.5                                             | 587.4674                                  | 255.6                                         |
| Dipalmitin         | DG<br>16:0_16:0     | 12.67                        | 551.5039                                      | 269.5                                             | 591.4957                                  | 264.2                                         |
| Diolein            | DG<br>18:1_18:1     | 12.90                        | 603.5350                                      | 274.6                                             | 643.5282                                  | 272.7                                         |
| Distearin          | DG<br>18:0_18:0     | 13.97                        | 607.5670                                      | 283.0                                             | 647.5596                                  | 278.1                                         |

**Table S1:** Reference data obtained from UPLC-IMS-QToF-MS measurements of diglyceride standards

| Glyceride standard | Glyceride structure | Average retention time (min) | Average experimental $m/z$ ( $[M+NH_4]^+$ ) | Average CCS ( $\text{\AA}^2$ ) ( $[M+NH_4]^+$ ) |
|--------------------|---------------------|------------------------------|---------------------------------------------|-------------------------------------------------|
| Tricaprilin        | TG 8:0/8:0/8:0      | 3.54                         | 488.3942                                    | 239.1                                           |
| Tricaprin          | TG 10:0/10:0/10:0   | 7.63                         | 572.4883                                    | 263.9                                           |
| Trilaurin          | TG 12:0/12:0/12:0   | 13.52                        | 656.5820                                    | 288.3                                           |
| Trimyristin        | TG 14:0/14:0/14:0   | 14.90                        | 740.6760                                    | 312.9                                           |
| Tripalmitin        | TG 16:0/16:0/16:0   | 15.88                        | 824.7706                                    | 335.3                                           |

**Table S2:** Reference data obtained from UPLC-IMS-QToF-MS measurements of triglyceride standards

| CN:DB | RCOOH+NH <sub>3</sub> neutral loss                  |           |
|-------|-----------------------------------------------------|-----------|
|       | Formula                                             | Mass (Da) |
| 2:0   | CH <sub>3</sub> COOHNH <sub>3</sub>                 | 77.04768  |
| 3:0   | C <sub>2</sub> H <sub>5</sub> COOHNH <sub>3</sub>   | 91.06333  |
| 4:0   | C <sub>3</sub> H <sub>7</sub> COOHNH <sub>3</sub>   | 105.07898 |
| 5:0   | C <sub>4</sub> H <sub>9</sub> COOHNH <sub>3</sub>   | 119.09463 |
| 6:0   | C <sub>5</sub> H <sub>11</sub> COOHNH <sub>3</sub>  | 133.11028 |
| 7:0   | C <sub>6</sub> H <sub>13</sub> COOHNH <sub>3</sub>  | 147.12593 |
| 8:0   | C <sub>7</sub> H <sub>15</sub> COOHNH <sub>3</sub>  | 161.14158 |
| 9:0   | C <sub>8</sub> H <sub>17</sub> COOHNH <sub>3</sub>  | 175.15723 |
| 10:0  | C <sub>9</sub> H <sub>19</sub> COOHNH <sub>3</sub>  | 189.17288 |
| 12:0  | C <sub>11</sub> H <sub>23</sub> COOHNH <sub>3</sub> | 217.20418 |
| 13:0  | C <sub>12</sub> H <sub>25</sub> COOHNH <sub>3</sub> | 231.21983 |
| 14:0  | C <sub>13</sub> H <sub>27</sub> COOHNH <sub>3</sub> | 245.23548 |
| 14:1  | C <sub>13</sub> H <sub>25</sub> COOHNH <sub>3</sub> | 243.21983 |
| 15:0  | C <sub>14</sub> H <sub>29</sub> COOHNH <sub>3</sub> | 259.25113 |
| 15:1  | C <sub>14</sub> H <sub>27</sub> COOHNH <sub>3</sub> | 257.23548 |
| 16:0  | C <sub>15</sub> H <sub>31</sub> COOHNH <sub>3</sub> | 273.26678 |
| 16:1  | C <sub>15</sub> H <sub>29</sub> COOHNH <sub>3</sub> | 271.25113 |
| 16:2  | C <sub>15</sub> H <sub>27</sub> COOHNH <sub>3</sub> | 269.23548 |
| 17:0  | C <sub>16</sub> H <sub>33</sub> COOHNH <sub>3</sub> | 287.28243 |
| 17:1  | C <sub>16</sub> H <sub>31</sub> COOHNH <sub>3</sub> | 285.26678 |
| 17:2  | C <sub>16</sub> H <sub>29</sub> COOHNH <sub>3</sub> | 283.25113 |
| 18:0  | C <sub>17</sub> H <sub>35</sub> COOHNH <sub>3</sub> | 301.29808 |
| 18:1  | C <sub>17</sub> H <sub>33</sub> COOHNH <sub>3</sub> | 299.28243 |
| 18:2  | C <sub>17</sub> H <sub>31</sub> COOHNH <sub>3</sub> | 297.26678 |
| 18:3  | C <sub>17</sub> H <sub>29</sub> COOHNH <sub>3</sub> | 295.25113 |
| 18:4  | C <sub>17</sub> H <sub>27</sub> COOHNH <sub>3</sub> | 293.23548 |
| 19:0  | C <sub>18</sub> H <sub>37</sub> COOHNH <sub>3</sub> | 315.31373 |
| 19:1  | C <sub>18</sub> H <sub>35</sub> COOHNH <sub>3</sub> | 313.29808 |
| 19:2  | C <sub>18</sub> H <sub>33</sub> COOHNH <sub>3</sub> | 311.28243 |
| 20:0  | C <sub>19</sub> H <sub>39</sub> COOHNH <sub>3</sub> | 329.32938 |
| 20:1  | C <sub>19</sub> H <sub>37</sub> COOHNH <sub>3</sub> | 327.31373 |
| 20:2  | C <sub>19</sub> H <sub>35</sub> COOHNH <sub>3</sub> | 325.29808 |
| 20:3  | C <sub>19</sub> H <sub>33</sub> COOHNH <sub>3</sub> | 323.28243 |
| 20:4  | C <sub>19</sub> H <sub>31</sub> COOHNH <sub>3</sub> | 321.26678 |
| 20:5  | C <sub>19</sub> H <sub>29</sub> COOHNH <sub>3</sub> | 319.25113 |
| 20:6  | C <sub>19</sub> H <sub>27</sub> COOHNH <sub>3</sub> | 317.23548 |
| 21:0  | C <sub>20</sub> H <sub>41</sub> COOHNH <sub>3</sub> | 343.34503 |
| 21:0  | C <sub>20</sub> H <sub>39</sub> COOHNH <sub>3</sub> | 341.32938 |
| 21:2  | C <sub>20</sub> H <sub>37</sub> COOHNH <sub>3</sub> | 339.31373 |
| 22:0  | C <sub>21</sub> H <sub>43</sub> COOHNH <sub>3</sub> | 357.36068 |
| 22:1  | C <sub>21</sub> H <sub>41</sub> COOHNH <sub>3</sub> | 355.34503 |
| 22:2  | C <sub>21</sub> H <sub>39</sub> COOHNH <sub>3</sub> | 353.32938 |
| 22:3  | C <sub>21</sub> H <sub>37</sub> COOHNH <sub>3</sub> | 351.31373 |
| 22:4  | C <sub>21</sub> H <sub>35</sub> COOHNH <sub>3</sub> | 349.29808 |
| 22:5  | C <sub>21</sub> H <sub>33</sub> COOHNH <sub>3</sub> | 347.28243 |

|      |                        |           |
|------|------------------------|-----------|
| 22:6 | $C_{21}H_{31}COOHNH_3$ | 345.26678 |
| 23:0 | $C_{22}H_{45}COOHNH_3$ | 371.37633 |
| 23:1 | $C_{22}H_{43}COOHNH_3$ | 369.36068 |
| 23:2 | $C_{22}H_{41}COOHNH_3$ | 367.34503 |
| 24:0 | $C_{23}H_{47}COOHNH_3$ | 385.39198 |
| 24:1 | $C_{23}H_{45}COOHNH_3$ | 383.37633 |
| 24:2 | $C_{23}H_{43}COOHNH_3$ | 381.36068 |
| 25:0 | $C_{24}H_{49}COOHNH_3$ | 399.40763 |
| 25:1 | $C_{24}H_{47}COOHNH_3$ | 397.39198 |
| 25:2 | $C_{24}H_{45}COOHNH_3$ | 395.37633 |

**Table S3:** Calculated values of fatty acid neutral losses

| ECN | CN:DB   | Average retention time (mi) | Average experimental $m/z$ ( $[M+NH_4]^+$ ) | Average CCS ( $\text{\AA}^2$ ) ( $[M+NH_4]^+$ ) | Observed fatty acid neutral losses             | Number of fingermarks [n = 30] (number of donors [n = 10]) |
|-----|---------|-----------------------------|---------------------------------------------|-------------------------------------------------|------------------------------------------------|------------------------------------------------------------|
| 28  | TG 28:0 | 6.05                        | 544.4570                                    | 255.2                                           | 8:0, 12:0                                      | 3 (2)                                                      |
| 30  | TG 30:0 | 7.97                        | 572.4882                                    | 263.9                                           | 8:0, 10:0, 12:0                                | 2 (1)                                                      |
| 32  | TG 32:0 | 10.56                       | 600.5192                                    | 272.1                                           | 8:0, 12:0                                      | 6 (2)                                                      |
| 34  | TG 34:0 | 13.00                       | 628.5507                                    | 278.7                                           | 6:0, 8:0, 10:0, 12:0, 14:0                     | 6 (2)                                                      |
|     | TG 36:1 | 13.13                       | 654.5663                                    | 280.7                                           | -                                              | 2 (1)                                                      |
| 36  | TG 36:0 | 13.60                       | 656.5820                                    | 286.9                                           | 10:0, 12:0, 14:0, 16:0                         | 12 (4)                                                     |
| 38  | TG 38:0 | 14.13                       | 684.6133                                    | 293.7                                           | 10:0, 12:0, 14:0, 16:0                         | 15 (6)                                                     |
|     | TG 40:1 | 14.18                       | 710.6287                                    | 297.5                                           | 12:0, 10:0, 18:1, 20:1                         | 6 (2)                                                      |
|     | TG 42:2 | 14.27                       | 736.6446                                    | 302.1                                           | 14:1, 16:1                                     | 9 (5)                                                      |
|     | TG 44:3 | 14.37                       | 762.6604                                    | 307.5                                           | 14:1, 16:1                                     | 3 (1)                                                      |
| 39  | TG 43:2 | 14.52                       | 750.6599                                    | 306.9                                           | 14:1, 15:0, 15:1, 16:1                         | 3 (2)                                                      |
|     | TG 45:3 | 14.58                       | 776.6758                                    | 311.7                                           | 14:1, 15:1, 16:1                               | 15 (8)                                                     |
| 40  | TG 40:0 | 14.58                       | 712.6445                                    | 301.2                                           | 10:0, 12:0, 14:0, 16:0, 18:0                   | 15 (5)                                                     |
|     | TG 42:1 | 14.64                       | 738.6601                                    | 306.0                                           | 12:0, 14:1, 15:0, 16:0, 16:1                   | 30 (10)                                                    |
|     | TG 44:2 | 14.72                       | 764.6759                                    | 310.4                                           | 8:0, 12:0, 14:0, 14:1, 16:0, 16:1, 18:1        | 27 (9)                                                     |
|     | TG 46:3 | 14.78                       | 790.6915                                    | 315.6                                           | 14:1, 16:1                                     | 30 (10)                                                    |
|     | TG 48:4 | 14.89                       | 816.7068                                    | 321.3                                           | -                                              | 2 (1)                                                      |
|     | TG 40:0 | 14.58                       | 712.6445                                    | 301.2                                           | 10:0, 12:0, 14:0, 16:0, 18:0                   | 15 (5)                                                     |
| 41  | TG 41:0 | 14.72                       | 726.6601                                    | 303.4                                           | 16:0                                           | 13 (8)                                                     |
|     | TG 43:1 | 14.79                       | 752.6757                                    | 309.3                                           | 12:0, 14:1, 15:0, 15:1, 16:0, 16:1             | 4 (4)                                                      |
|     | TG 45:2 | 14.89                       | 778.6915                                    | 314.5                                           | 13:0, 14:1, 15:0, 15:1, 16:0, 16:1, 17:1, 18:1 | 30 (10)                                                    |
|     | TG 47:3 | 14.96                       | 804.7071                                    | 319.2                                           | 14:1, 15:1, 16:1, 18:1                         | 30 (10)                                                    |
| 42  | TG 42:0 | 14.98                       | 740.6757                                    | 308.2                                           | 12:0, 16:0, 18:0                               | 16 (6)                                                     |

|    |          |       |          |       |                                                         |         |
|----|----------|-------|----------|-------|---------------------------------------------------------|---------|
|    | *TG 44:1 | 15.03 | 766.6915 | 313.1 | 12:0, 14:0,<br>14:1, 15:0,<br>16:0, 16:1,<br>18:0       | 30 (10) |
|    | *TG 46:2 | 15.09 | 792.7073 | 318.4 | 14:1, 15:0,<br>16:0, 16:1                               | 30 (10) |
|    | *TG 48:3 | 15.14 | 818.7228 | 323.3 | 14:1, 16:1                                              | 30 (10) |
|    | TG 50:4  | 15.20 | 844.7385 | 329.1 | -                                                       | 2 (1)   |
|    | TG 54:6  | 15.14 | 896.7694 | 334.7 | 18:2                                                    | 4 (2)   |
| 43 | TG 43:0  | 15.10 | 754.6914 | 310.9 | 16:0                                                    | 18 (7)  |
|    | *TG 45:1 | 15.18 | 780.7072 | 316.7 | 12:0, 14:0,<br>14:1, 15:0,<br>16:0, 16:1,<br>17:1, 18:0 | 26 (10) |
|    | *TG 47:2 | 15.25 | 806.7228 | 322.2 | 14:1, 15:0,<br>16:1, 17:1,<br>18:1                      | 30 (10) |
|    | TG 49:3  | 15.29 | 832.7384 | 325.2 | 14:1, 15:0,<br>15:1, 16:1,<br>17:1, 18:1                | 30 (10) |
| 44 | TG 44:0  | 15.33 | 768.7067 | 315.6 | 12:0, 15:0,<br>16:0, 18:0                               | 25 (10) |
|    | *TG 46:1 | 15.38 | 794.7228 | 320.7 | 12:0, 14:1,<br>15:0, 16:0,<br>16:1, 18:0,<br>18:1       | 30 (10) |
|    | *TG 48:2 | 15.42 | 820.7385 | 325.8 | 14:0, 14:1,<br>16:0, 16:1,<br>18:0, 18:1                | 30 (10) |
|    | *TG 50:3 | 15.45 | 846.7541 | 330.7 | 16:1, 18:0,<br>18:1                                     | 30 (10) |
|    | TG 52:4  | 15.45 | 872.7697 | 333.4 | 16:0, 18:2                                              | 4 (2)   |
|    | TG 54:5  | 15.43 | 898.7849 | 338.5 | 18:1, 18:2                                              | 11 (4)  |
| 45 | TG 45:0  | 15.45 | 782.7228 | 318.1 | 18:0, 16:0                                              | 23 (9)  |
|    | *TG 47:1 | 15.52 | 808.7385 | 324.3 | 14:0, 14:1,<br>15:0, 16:0,<br>16:1, 18:0,<br>20:1       | 29 (10) |
|    | *TG 49:2 | 15.56 | 834.7541 | 329.7 | 15:0, 16:0,<br>16:1, 17:1,<br>18:0, 18:1,<br>18:2       | 30 (10) |
|    | TG 51:3  | 15.59 | 860.7697 | 334.6 | 16:0, 16:1,<br>18:1                                     | 30 (10) |
|    | TG 53:4  | 15.66 | 886.7846 | 339.3 | -                                                       | 3 (2)   |
| 46 | *TG 46:0 | 15.65 | 796.7385 | 322.4 | 14:0, 15:0,<br>16:0, 18:0                               | 20 (8)  |
|    | *TG 48:1 | 15.69 | 822.7542 | 327.8 | 14:0, 16:0,<br>16:1, 18:0,<br>18:1                      | 30 (10) |
|    | *TG 50:2 | 15.72 | 848.7698 | 333.2 | 14:0, 16:                                               | 30 (10) |

|    |          |       |          |       |                                                   |         |
|----|----------|-------|----------|-------|---------------------------------------------------|---------|
|    |          |       |          |       | 16:1                                              |         |
|    | *TG 52:3 | 15.72 | 874.7854 | 337.5 | 16:1, 16:0,<br>18:1, 18:2                         | 30 (10) |
|    | TG 54:4  | 15.71 | 900.8008 | 341.2 | -                                                 | 16 (6)  |
| 47 | *TG 47:0 | 15.77 | 810.7541 | 325.8 | 16:0, 18:0                                        | 29 (10) |
|    | *TG 49:1 | 15.81 | 836.7698 | 331.5 | 14:0, 15:0,<br>16:0, 16:1,<br>17:1, 18:1          | 30 (10) |
|    | *TG 51:2 | 15.84 | 862.7854 | 336.8 | 14:0, 15:0,<br>16:0, 16:1,<br>17:1, 18:1,<br>18:2 | 30 (10) |
|    | TG 53:3  | 15.87 | 888.8008 | 341.7 | 16:0, 16:1,<br>18:0, 18:1,<br>18:2, 20:0,<br>20:1 | 30 (10) |
| 48 | *TG 48:0 | 15.95 | 824.7698 | 329.8 | 16:0, 18:0,<br>20:0                               | 23 (8)  |
|    | *TG 50:1 | 15.97 | 850.7854 | 335.5 | 14:0, 16:0,<br>16:1, 18:0,<br>18:1                | 30 (10) |
|    | *TG 52:2 | 15.97 | 876.8009 | 339.9 | 16:0, 16:1,<br>18:0, 18:1                         | 30 (10) |
|    | TG 54:3  | 15.97 | 902.8165 | 344.6 | 18:1                                              | 28 (10) |
|    | TG 56:4  | 16.08 | 928.8324 | 351.2 | -                                                 | 4 (2)   |
| 49 | TG 49:0  | 16.06 | 838.7853 | 333.2 | 16:0, 18:0                                        | 30 (10) |
|    | *TG 51:1 | 16.08 | 864.8010 | 338.7 | 16:0, 16:1,<br>18:0, 18:1                         | 30 (10) |
|    | TG 53:2  | 16.11 | 890.8166 | 343.8 | 16:0, 16:1,<br>18:0                               | 30 (10) |
|    | TG 55:3  | 16.14 | 916.8327 | 348.7 | 16:0, 16:1                                        | 9 (4)   |
| 50 | TG 52:1  | 16.24 | 878.8165 | 342.1 | 14:0, 16:0,<br>18:1, 18:0,                        | 30 (10) |
|    | TG 54:2  | 16.24 | 904.8322 | 347.1 | 14:0, 16:0,<br>18:1, 18:0,<br>20:0                | 30 (10) |
|    | TG 56:3  | 16.27 | 930.8480 | 351.8 | 14:0, 14:1,<br>16:0, 18:0                         | 12 (5)  |
| 51 | TG 51:0  | 16.32 | 866.8162 | 340.2 | 16:0, 18:0,<br>20:0                               | 25 (9)  |
|    | TG 53:1  | 16.35 | 892.8320 | 345.4 | 14:1, 16:1,<br>16:0, 18:0,<br>20:0, 20:1          | 30 (10) |
|    | TG 55:2  | 16.38 | 918.8477 | 350.2 | 14:0, 14:1,<br>16:0, 16:1,<br>18:0, 18:2,<br>20:0 | 28 (10) |
| 52 | TG 54:1  | 16.49 | 906.8476 | 349.1 | 16:0, 16:1,<br>18:0, 18:1,<br>20:0, 20:1,<br>22:0 | 30 (10) |

|    |         |       |          |       |                                                         |         |
|----|---------|-------|----------|-------|---------------------------------------------------------|---------|
|    | TG 56:2 | 16.50 | 932.8635 | 354.0 | 14:0, 14:1,<br>16:0, 16:1,<br>18:0, 18:2                | 28 (10) |
| 53 | TG 53:0 | 16.57 | 894.8472 | 347.0 | 14:0, 16:0                                              | 20 (8)  |
|    | TG 55:1 | 16.61 | 920.8633 | 352.1 | 12:0, 14:0,<br>14:1, 16:0,<br>16:1, 20:0,<br>22:0, 24:0 | 30 (10) |
|    | TG 57:2 | 16.63 | 946.8790 | 356.9 | 14:0, 16:0,<br>16:1, 17:1                               | 27 (10) |
| 54 | TG 54:0 | 16.73 | 908.8633 | 351.6 | 18:0                                                    | 3 (3)   |
|    | TG 56:1 | 16.73 | 934.8787 | 355.9 | 14:0, 14:1,<br>16:0, 16:1,<br>18:0, 20:0                | 30 (10) |
|    | TG 58:2 | 16.73 | 960.8944 | 360.7 | 14:0, 14:1,<br>16:0                                     | 26 (10) |
| 55 | TG 55:0 | 16.81 | 922.8783 | 354.6 | 14:0, 16:0                                              | 16 (8)  |
|    | TG 57:1 | 16.83 | 948.8944 | 359.3 | 14:0, 16:0,<br>16:1, 24:0                               | 29 (10) |
|    | TG 59:2 | 16.84 | 974.9098 | 364.0 | 14:0, 16:0,<br>16:1                                     | 16 (6)  |
| 56 | TG 56:0 | 16.93 | 936.8945 | 358.4 | 14:0, 16:0                                              | 12 (7)  |
|    | TG 58:1 | 16.94 | 962.9101 | 363.1 | 14:0, 16:0,<br>16:1                                     | 29 (10) |
|    | TG 60:2 | 16.95 | 988.9255 | 367.8 | 14:0, 14:1,<br>16:0                                     | 12 (7)  |
| 57 | TG 57:0 | 17.02 | 950.9095 | 361.7 | 16:0, 18:0                                              | 9 (6)   |
|    | TG 59:1 | 17.03 | 976.9253 | 366.6 | 14:0, 16:0,<br>16:1, 18:0                               | 14 (6)  |
| 58 | TG 58:0 | 17.15 | 964.9254 | 365.1 | 14:0, 16:0,<br>18:0                                     | 4 (3)   |
|    | TG 60:1 | 17.17 | 990.9409 | 370.0 | 14:0, 16:0                                              | 3 (2)   |
| 59 | TG 59:0 | 17.24 | 978.9412 | 368.8 | 16:0, 18:0                                              | 2 (2)   |

**Table S4:** Triglycerides identified in latent fingerprints from 10 donors. Italicised compounds are consistent with triglyceride standards. Compounds denoted with an asterisk are also presented in Table 4.
